# Supplementary material for: Enhanced capacities of carbon nanosheets derived from functionalized bacterial cellulose as anodes for sodium ion batteries
Source: Royal Society of Chemistry journal article supplement (doi:10.1039/c7ra10118j), 2017-01-01
Supplement: c7ra10118j1.pdf [file c7ra10118j1.pdf]

Electronic Supplementary Information (ESI)

**Enhanced Capacities of Carbon Nanosheets Derived from  
Functionalized Bacterial Cellulose as Anodes for Sodium Ion Batteries**

Tianyun Zhang,<sup>a,b,c</sup> Jiangtao Chen,<sup>c</sup> Bingjun Yang,<sup>c</sup>

Hongxia Li,<sup>c,d</sup> Shulai Lei,<sup>c</sup> and Xin Ding <sup>\*,a</sup>

<sup>a</sup> College of Textiles, Donghua University, Shanghai 201620, China.

<sup>b</sup> School of Mechanical and Electrical Engineering, Lanzhou University of Technology, Lanzhou 730050, China.

<sup>c</sup> Laboratory of Clean Energy Chemistry and Materials, State Key Laboratory of Solid Lubrication, Lanzhou Institute of Chemical Physics, Chinese Academy of Sciences, Lanzhou 730000, China.

<sup>d</sup> School of Petrochemical Engineering, Lanzhou University of Technology, Lanzhou 730050, China

\* The corresponding authors: E-mail: xding@dhu.edu.cn ; Tel: +86-21-67792663

## Supporting Figures

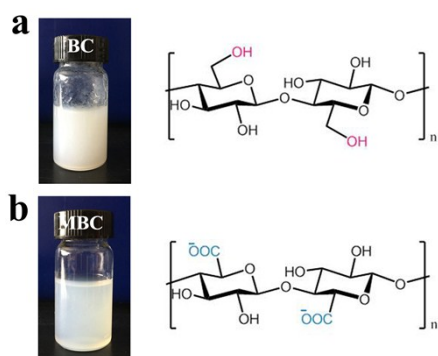

**Fig. S1** Digital photos of (a) BC and (b) MBC suspension of  $4 \text{ mg ml}^{-1}$  after 30 days standing.

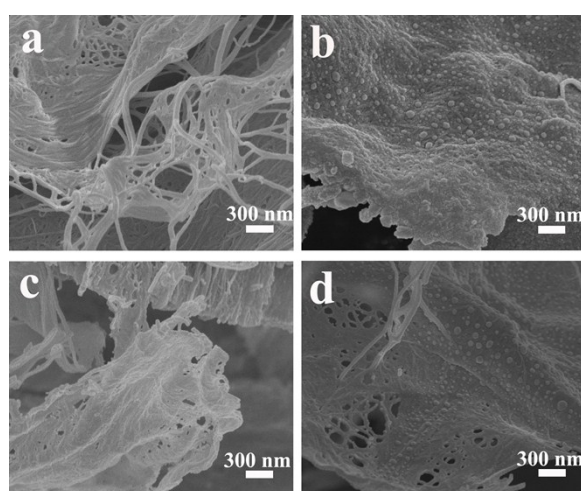

**Fig. S2** SEM images of (a) p-BC900; (b) p-BC1100; (c) p-MBC900; (d) p-MBC1100.

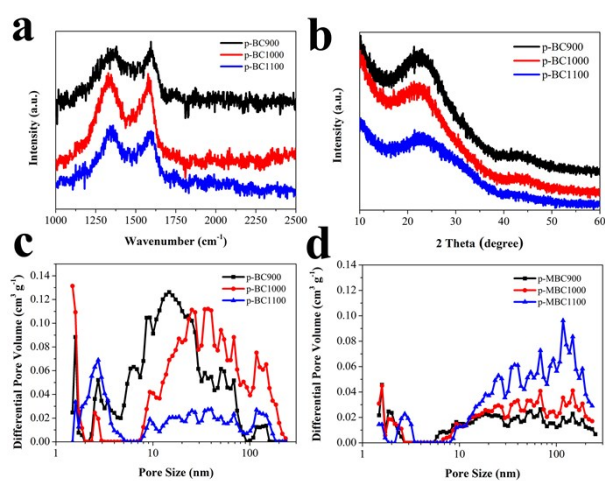

**Fig. S3** (a) Raman spectra of p-BC; (b) XRD patterns of p-BC; The pore size distributions of (c) p-BC and (d) p-MBC.

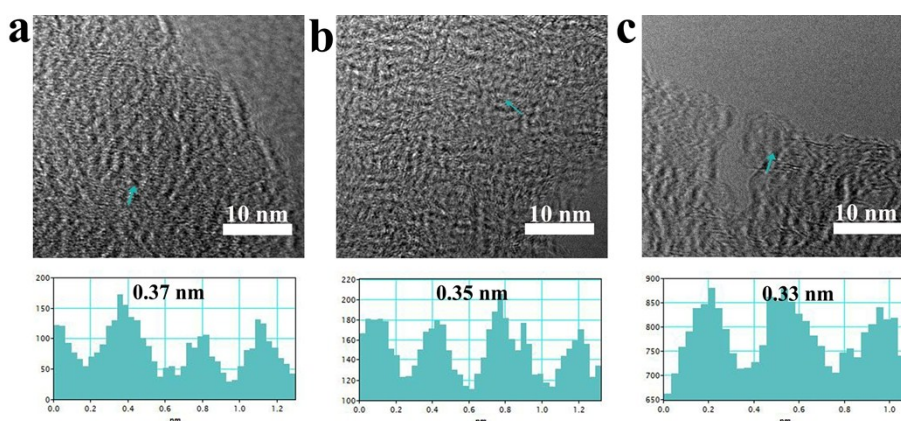

**Fig. S4** HRTEM images of (a) p-BC900; (b) p-BC1000; (c) p-BC1100.

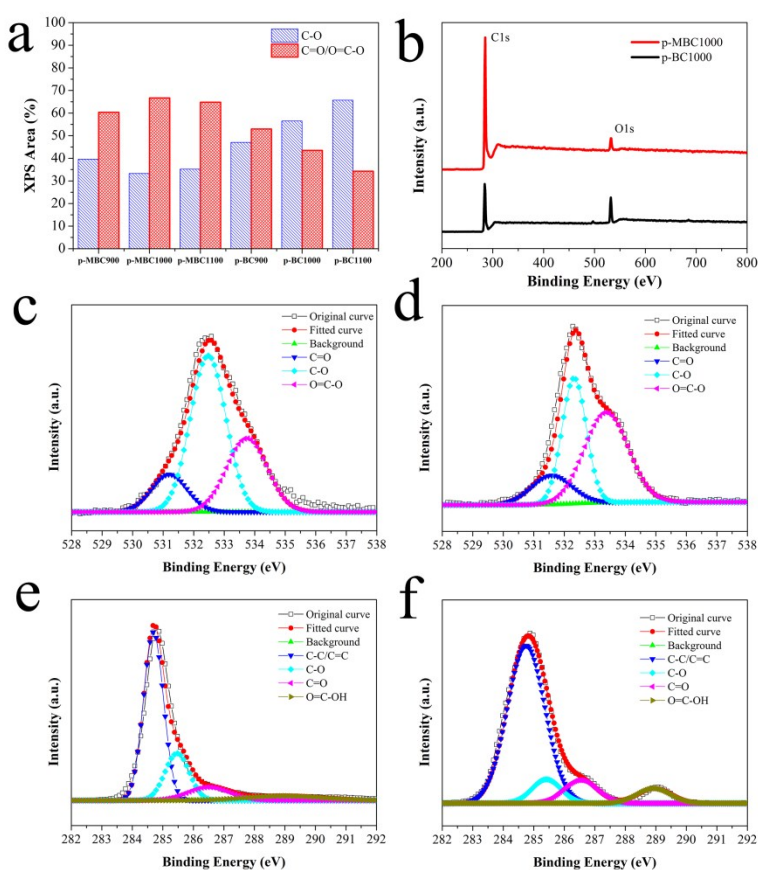

**Fig. S5** (a) The variation of the amount of oxygen groups for samples; (b) XPS survey spectra of p-BC1000 and p-MBC1000 showing the relative intensities of carbon C1s and oxygen O 1s; (c) O 1s XPS spectra of p-BC1000; (d) O 1s XPS spectra of p-MBC1000; (e) C 1s XPS spectra of p-BC1000; (f) C 1s XPS spectra of p-MBC1000.

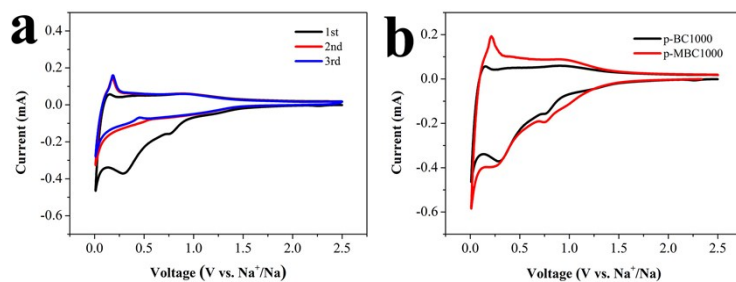

**Fig. S6** (a) The cyclic voltammetry curves of p-BC1000; (b) Comparison of the 1st CV cycle for p-MBC1000 and p-BC1000.

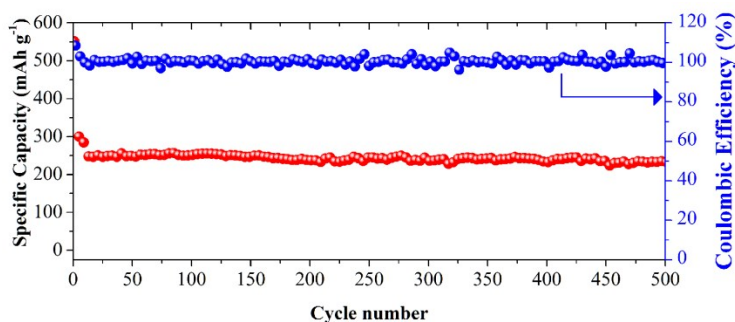

**Fig. S7** Cycle performance of p-MBC1000 at a current density of  $0.1 \text{ A g}^{-1}$ . The current density of initial 10 cycles is  $0.05 \text{ A g}^{-1}$ .

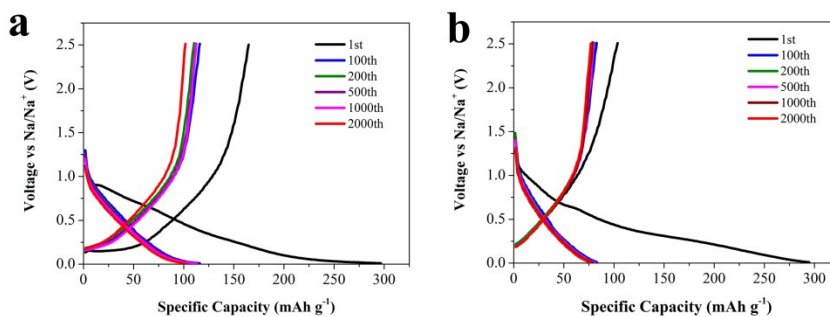

**Fig. S8** Galvanostatic 1<sup>st</sup>, 100<sup>th</sup>, 200<sup>th</sup>, 500<sup>th</sup>, 1000<sup>th</sup> and 2000<sup>th</sup> discharge/charge profiles of (a)p-MBC1000 and (b)p-BC1000 at a current rate of  $1 \text{ A g}^{-1}$  in a voltage range of 0.01 - 2.5 V.

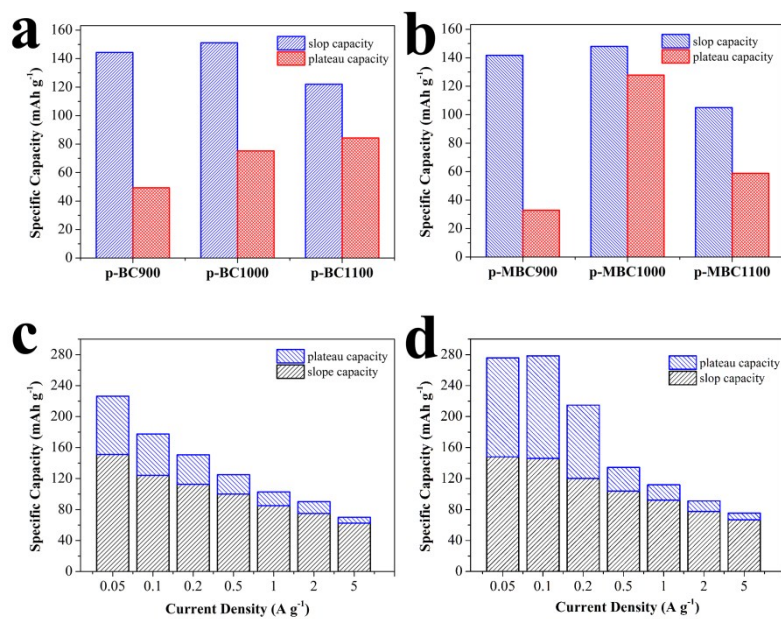

**Fig. S9** Summary of the capacity potential distribution of (a) p-BCx; (b) p-MBCx; (c) p-BC1000; (d) p-MBC1000.

**Table S1** Parameters for p-BCx and p-MBCx.

| Sample                                                       | p-BC900 | p-BC1000 | p-BC1100 | p-MBC900 | p-MBC1000 | p-MBC1100 |
|--------------------------------------------------------------|---------|----------|----------|----------|-----------|-----------|
| $S_{\text{BET}}$ ( $\text{m}^2 \text{g}^{-1}$ ) <sup>a</sup> | 487.76  | 342.46   | 167.12   | 198.46   | 153.15    | 39.64     |
| $V_t$ ( $\text{cm}^3 \text{g}^{-1}$ ) <sup>b</sup>           | 0.40    | 0.33     | 0.16     | 0.13     | 0.12      | 0.09      |
| $I_D/I_G$ <sup>c</sup>                                       | 1.05    | 1.31     | 1.22     | 1.29     | 1.33      | 1.33      |
| ICE (%) <sup>d</sup>                                         | 36      | 38       | 44       | 52       | 50        | 44        |

<sup>a</sup> Surface area was calculated with BET method.

<sup>b</sup> The total pore volume was determined at a relative pressure of 0.99.

<sup>c</sup>  $I_D/I_G$  are the integrated intensities of D- and G- band.

<sup>d</sup> The initial Coulombic efficiency (ICE).

**Table S2** Performance comparison of p-BC1000 and p-MBC1000 versus state-of-the-art anode carbons derived cellulose of SIBs reported in literatures

| Types of materials             | Current density<br>(mA g <sup>-1</sup> ) | Specific capacity<br>(mAh g <sup>-1</sup> ) | Cycling stability                                                    | ICE<br>(%) | Ref.s            |
|--------------------------------|------------------------------------------|---------------------------------------------|----------------------------------------------------------------------|------------|------------------|
| Ordered cellulose nanocrystals | 20 (200)                                 | 375 (220)                                   | 300 mAh g <sup>-1</sup> after 400 cycles at 100 mA g <sup>-1</sup>   | 22.7       | 1                |
| Cellulose nanofibers           | 40 (2000)                                | 255 (85)                                    | 176 mAh g <sup>-1</sup> after 600 cycles at 200 mA g <sup>-1</sup>   | 58.8       | 2                |
| Cotton                         | 30 (600)                                 | 315 (84)                                    | 305 mAh g <sup>-1</sup> after 100 cycles at 30 mA g <sup>-1</sup>    | 85         | 3                |
| Filter paper (DPC-A)           | 20 (100)                                 | 289 (117)                                   | 286 mAh g <sup>-1</sup> after 100 cycles at 20 mA g <sup>-1</sup>    | 81         | 4                |
| Tempo-cellulose                | 20                                       | 260                                         | 196 mAh g <sup>-1</sup> after 200 cycles at 100 mA g <sup>-1</sup>   | 72         | 5                |
| PBC-750                        | 30 (3000)                                | 161 (9)                                     | —                                                                    | 35.5       | 6                |
| Ppy@BC                         |                                          |                                             |                                                                      |            | 7                |
| CNF                            | 50 (1000)                                | 71(36)                                      | 60.5 mAh g <sup>-1</sup> after 400 cycles at 500 mA g <sup>-1</sup>  | —          |                  |
| CNF@ NPC                       | 50 (1000)                                | 258.3 (146.5)                               | 148.8 mAh g <sup>-1</sup> after 400 cycles at 500 mA g <sup>-1</sup> | 29.4       |                  |
| PANI/BC/KOH (NOC)              | 100 (5000)                               | 650 (161)                                   | 240 mAh g <sup>-1</sup> after 2000 cycles at 2 A g <sup>-1</sup>     | 30         | 8                |
| BN-CNF                         | 200 (10000)                              | 644 (314)                                   | 277 mAh g <sup>-1</sup> after 1000 cycles at 10 A g <sup>-1</sup>    | 36.6       | 9                |
| EG                             | 20 (200)                                 | 284 (91)                                    | 73.92 % after 2000 cycles at 100 mA g <sup>-1</sup>                  | 49.53      | 10               |
| <b>p-BC1000</b>                | <b>100 (5000)</b>                        | <b>185 (70)</b>                             | 76 mAh g <sup>-1</sup> after 2000 cycles at 1 A g <sup>-1</sup>      | <b>38</b>  | <b>This work</b> |
| <b>p-MBC1000</b>               | <b>100 (5000)</b>                        | <b>310 (81)</b>                             | 102 mAh g <sup>-1</sup> after 2000 cycles at 1 A g <sup>-1</sup>     | <b>50</b>  |                  |

1 H. Zhu, F. Shen, W. Luo, S. Zhu, M. Zhao, B. Natarajan, J. Dai, L. Zhou, X. Ji, R. S. Yassar, T. Li and L. Hu, *Nano Energy*, 2017, **33**, 37-44.

2 W. Luo, J. Schardt, C. Bommier, B. Wang, J. Razink, J. Simonsen and X. L. Ji, *J. Mater. Chem. A*, 2013, **1**,

- 10662-10666.
- 3 Y. Li, Y.-S. Hu, M.-M. Titirici, L. Chen and X. Huang, *Adv. Energy Mater.*, 2016, **6**, 1600659.
  - 4 P. Zheng, T. Liu and S. W. Guo, *Sci Rep.*, 2016, **6**, 35620-35626.
  - 5 F. Shen, H. Zhu, W. Luo, J. Wan, L. Zhou, J. Dai, B. Zhao, X. Han, K. Fu and L. Hu, *ACS Appl. Mat. Interfaces*, 2015, **7**, 23291-23296.
  - 6 B. Dursun, T. Sar, A. Ata, M. Morcrette, M. Y. Akbas and R. Demir-Cakan, *Cellulose*, 2016, **23**, 2597-2607.
  - 7 Z. Zhang, J. Zhang, X. Zhao and F. Yang, *Carbon*, 2015, **95**, 552-559.
  - 8 M. Wang, Z. Yang, W. Li, L. Gu and Y. Yu, *Small*, 2016, **12**, 2559-2566.
  - 9 M. Wang, Y. Yang, Z. Yang, L. Gu, Q. Chen and Y. Yu, *Adv. Sci.* 2017, **4**, 1600468.
  - 10 Y. Wen, K. He, Y. Zhu, F. Han, Y. Xu, I. Matsuda, Y. Ishii, J. Cumings and C. Wang, *Nat. Commun.*, 2014, **5**, 4033.
